# Supplementary material
Source: PubMed Central journal article supplement (PMC6130955)
Supplement: supp_RA118.003541_137547_2_supp_170397_pc1td7.pdf [file supp_RA118.003541_137547_2_supp_170397_pc1td7.pdf]

## **Supporting Information**

### **Perilipin 1 (Plin1) Deficiency Promotes Inflammatory Responses in Lean Adipose Tissue through Lipid Dysregulation**

Jee Hyung Sohn, Yun Kyung Lee, Ji Seul Han, Yong Geun Jeon, Jong In Kim, Sung Sik Choe, Su Jung Kim, Hyun Ju Yoo and Jae Bum Kim

**Table S1. Fold changes of lipid metabolites released from SVC-derived adipocytes.**

| Metabolite feature (MW/rt) | METLIN Search                                                           | Class                                                         | Fold change ( $\text{Log}_2 \text{Plin1}^{-/-} / \text{Plin1}^{+/+}$ ) |
|----------------------------|-------------------------------------------------------------------------|---------------------------------------------------------------|------------------------------------------------------------------------|
| 455.391/31.24              | Arachidyl carnitine                                                     | Fatty acyls (acyl carnitines)                                 | 1.181536                                                               |
| 340.2932/29.95             | Glycidyl stearate, 2-oxo-heneicosanoic acid                             |                                                               | 1.159548                                                               |
| 770.5644/30                | PC(35:2), PE(38:2)                                                      | Glycerophospholipids                                          | 1.068222                                                               |
| 337.33/29.63               | 13Z-Docosenamide                                                        | Fatty acyls (fatty amides)                                    | 1.04465                                                                |
| 768.5683/29.89             | PA(41:3)                                                                | Glycerophospholipids                                          | 1.025215                                                               |
| 769.5718/30.29             | PC(35:3), PE(38:3)                                                      | Glycerophospholipids                                          | 1.024059                                                               |
| 380.2851/21.28             | 24-Nor-5 $\beta$ -cholan-3 $\alpha$ ,7 $\alpha$ ,22,23-tetrol, MG(20:3) |                                                               | 0.857633                                                               |
| 756.531/31.1               | PG(O-36:4), PG(P-36:3)                                                  | Glycerophospholipids                                          | 0.822948                                                               |
| 757.5348/31.05             | PS(P-35:2)                                                              | Glycerophospholipids                                          | 0.803131                                                               |
| 256.2366/21.45             | Palmitic acid                                                           | Fatty acyls (fatty acids and derivatives)                     | 0.68305                                                                |
| 299.2787/20.34             | Sphingosine, 3-ketosphinganine, Palmitoyl Ethanolamide                  | Organonitrogen compounds                                      | 0.666305                                                               |
| 602.3848/2.28              | PA(29:2)                                                                | Glycerophospholipids                                          | 0.597865                                                               |
| 298.2469/17.77             | 9-hydroxy-13Z-octadecenoic acid, Ricinoleic acid                        | Fatty acyls (fatty acids and derivatives)                     | 0.561922                                                               |
| 720.4832/2.58              | PA(28:6), PG(32:1)                                                      | Glycerophospholipids                                          | 0.454224                                                               |
| 554.35/1.92                | PG(21:0/0:0)                                                            | Glycerophospholipids                                          | 0.428229                                                               |
| 740.5373/21.15             | PA(39:3)                                                                | Glycerophospholipids                                          | 0.404163                                                               |
| 712.4059/1.95              | PI(25:0)                                                                | Glycerophospholipids                                          | 0.374166                                                               |
| 370.3035/22.59             | Docosanedioic acid                                                      | Fatty acyls (fatty acids and derivatives)                     | 0.338426                                                               |
| 620.295/16.36              | PI(20:4)                                                                | Glycerophospholipids                                          | 0.319366                                                               |
| 336.2963/20.9              | 5,13-docosadienoic acid                                                 | Fatty acyls (fatty acids and derivatives)                     | 0.31618                                                                |
| 328.2933/23.9              | 3R-hydroxy-eicosanoic acid                                              | Fatty acyls (fatty acids and derivatives)                     | 0.313408                                                               |
| 364.1452/2.11              | N-Acetylmuramoyl-Ala                                                    |                                                               | 0.303871                                                               |
| 753.4682/2.39              | PS(34:5)                                                                | Glycerophospholipids                                          | 0.28537                                                                |
| 498.2883/2.12              | PG(17:0/0:0)                                                            | Glycerophospholipids                                          | 0.284992                                                               |
| 276.094/2.11               | Glutamyl-glutamic acid                                                  |                                                               | 0.244705                                                               |
| 215.1131/2.01              | 2-amino-8-oxo-9,10-epoxy-decanoic acid                                  | Fatty acyls (fatty acids and derivatives)                     | 0.234206                                                               |
| 347.2755/21.3              | Arachidonoyl Ethanolamide                                               | Organonitrogen compounds<br>Direct Parent N-acylethanolamines | 0.233468                                                               |
| 698.3905/1.94              | PI(24:0)                                                                | Glycerophospholipids                                          | 0.218434                                                               |
| 349.1957/2.1               | Coutaric acid                                                           | Amino acids, peptides, and analogues                          | 0.218434                                                               |
| 282.252/15.83              | Oleic Acid                                                              | Fatty acyls (fatty acids and derivatives)                     | 0.210324                                                               |
| 354.1423/4.15              | S-Adenosylmethioninamine                                                | 5'-deoxyribonucleosides                                       | 0.207633                                                               |
| 316.204/2.02               | 15-deoxy- $\delta$ -12,14-PGJ2, 19-Hydroxy-13-cis-retinoic acid         | Fatty acyls (eicosanoids and derivatives)                     | 0.184757                                                               |
| 767.52/1.88                | PS(O-36:5), PS(P-36:4)                                                  | Glycerophospholipids                                          | 0.173124                                                               |
| 392.2848/22.78             | 1 $\alpha$ ,3 $\alpha$ -Dihydroxy-5 $\beta$ -cholan-24-oic Acid         |                                                               | 0.169472                                                               |
| 282.1066/3.78              | 2,3-Diphenyl-1-indanone                                                 |                                                               | 0.157641                                                               |
| 190.0968/10.09             | Diaminopimelic acid, Alanyl-Threonine                                   | Carboxylic acids and derivatives                              | 0.157112                                                               |
| 270.216/10.12              | 16-hydroxy-5-hexadecenoic acid, 5-keto palmitic acid                    | Fatty acyls (fatty acids and derivatives)                     | 0.140856                                                               |
| 368.1704/6.03              | Testosterone sulfate                                                    | Steroids and steroid derivatives                              | 0.139633                                                               |
| 270.216/8.28               | 16-hydroxy-6-hexadecenoic acid                                          | Fatty acyls (fatty acids and derivatives)                     | 0.115991                                                               |
| 444.3002/9.7               | Stearyl citrate                                                         |                                                               | 0.115675                                                               |
| 470.2931/2.67              | PG(O-16:0)                                                              |                                                               | 0.112739                                                               |
| 174.1021/8.45              | N2-Acetyl-L-ornithine, Valyl-Glycine                                    | Carboxylic acids and derivatives                              | 0.11045                                                                |
| 252.2057/8.41              | 7,10-hexadecadienoic acid                                               | Fatty acyls (fatty acids and derivatives)                     | 0.109846                                                               |
| 220.1072/6.45              | N-Acetyl-b-glucosaminylamine                                            | Organooxygen compounds                                        | 0.105796                                                               |
| 254.2211/13.54             | cis-9-palmitoleic acid, 11-hexadecenoic acid                            | Fatty acyls (fatty acids and derivatives)                     | 0.101884                                                               |
| 378.293/9.86               | cholesta-5,7,8(14),22E-tetraen-3-one                                    |                                                               | 0.097712                                                               |
| 298.2468/11.26             | 9-hydroxy-12Z-octadecenoic acid, Ricinoleic acid                        | Fatty acyls (fatty acids and derivatives)                     | 0.097421                                                               |
| 280.2365/12.52             | Linoleic acid                                                           | Fatty acyls (fatty acids and derivatives)                     | 0.094585                                                               |
| 351.1579/7.05              | Phenylalanyl-Tryptophan                                                 | Carboxylic acids and derivatives                              | 0.086142                                                               |
| 356.2492/9.56              | PGF1 $\alpha$ , 13,14-dihydro PGF2 $\alpha$                             | Fatty acyls (eicosanoids and derivatives)                     | 0.076672                                                               |
| 357.2623/15.32             | Leucyl-leucyl-norleucine                                                |                                                               | 0.073382                                                               |
| 386.1804/5.59              | 6-bromo-eicosa-5E,9Z-dienoic acid                                       |                                                               | 0.039522                                                               |
| 400.147/2.61               | N-Monodesmethylidiltiazem                                               |                                                               | 0.03026                                                                |
| 636.2893/14.35             | Thalsimine                                                              |                                                               | 0.021127                                                               |
| 164.0663/3.03              | $\beta$ -D-Fucose                                                       | Organooxygen compounds                                        | 0.011422                                                               |
| 368.1578/3.6               | PA(12:0)                                                                | Glycerophospholipids                                          | -0.08932                                                               |

Metabolites were identified by matching accurate mass (MW) data to METLIN database. Only data with *p* value less than 0.05 were represented. *p* value was calculated by Mann-Whitney U test (*n* = 3 per group). rt., retention time.
